# Supplementary material
Source: PubMed Central journal article supplement (PMC5697938)
Supplement: DB170261SupplementaryData.pdf [file DB170261SupplementaryData.pdf]

SUPPLEMENTARY DATA

**Supplemental Table 1.** Cox regression analysis of the 41 type 1 diabetes risk loci on the risk of progression from multiple autoantibodies to type 1 diabetes. Cox model for each SNP was adjusted for age at multiple autoantibodies onset, HLA-DR-DQ genotype, sex, family history of T1D, type of first autoantibody and the top two principal components from the principal components analysis on TEDDY ImmunoChip data. The minor allele frequency (MAF) for the respective SNP was calculated from the study population.

| Chr            | SNP               | Gene of interest          | Minor allele | MAF         | HR (95% CI)              | p            |
|----------------|-------------------|---------------------------|--------------|-------------|--------------------------|--------------|
| 1p13.2         | rs2476601         | <i>PTPN22</i>             | A            | 0.18        | 1.21 (0.88, 1.65)        | 0.241        |
| 1p31.3         | rs2269241         | <i>PGM1</i>               | C            | 0.25        | 0.91 (0.70, 1.18)        | 0.472        |
| 1q31.2         | rs2816316         | <i>RGS1</i>               | C            | 0.18        | 0.88 (0.67, 1.16)        | 0.371        |
| 1q32.1         | rs3024505         | <i>IL10</i>               | A            | 0.16        | 1.06 (0.81, 1.41)        | 0.661        |
| <b>2p25.1</b>  | <b>rs1534422</b>  | <b>0</b>                  | <b>G</b>     | <b>0.47</b> | <b>1.39 (1.10, 1.76)</b> | <b>0.005</b> |
| 2q24.2         | rs1990760         | <i>IFIH1</i>              | C            | 0.38        | 1.02 (0.82, 1.28)        | 0.831        |
| 2q33.2         | rs3087243         | <i>CTLA4</i>              | A            | 0.38        | 1.16 (0.94, 1.44)        | 0.171        |
| 3p21.31        | rs11711054        | <i>CCR5</i>               | G            | 0.31        | 1.04 (0.82, 1.31)        | 0.772        |
| <b>4p15.2</b>  | <b>rs10517086</b> | <b>0</b>                  | <b>A</b>     | <b>0.33</b> | <b>1.31 (1.03, 1.66)</b> | <b>0.026</b> |
| 4q27           | rs4505848         | <i>IL2</i>                | G            | 0.39        | 1.19 (0.95, 1.49)        | 0.122        |
| 5p13.2         | rs6897932         | <i>IL7R</i>               | T            | 0.27        | 1.15 (0.89, 1.49)        | 0.284        |
| 6q22.32        | rs9388489         | <i>C6orf173</i>           | G            | 0.45        | 0.99 (0.78, 1.25)        | 0.926        |
| <b>6q23.3</b>  | <b>rs2327832</b>  | <b>TNFAIP3</b>            | <b>G</b>     | <b>0.20</b> | <b>1.37 (1.06, 1.78)</b> | <b>0.017</b> |
| 6q25.3         | rs1738074         | <i>TAGAP</i>              | T            | 0.40        | 1.12 (0.90, 1.41)        | 0.305        |
| 7p12.1         | rs4948088         | <i>COBL</i>               | A            | 0.03        | 1.11 (0.62, 1.99)        | 0.718        |
| 7p15.2         | rs7804356         | <i>SKAP2</i>              | C            | 0.20        | 1.21 (0.91, 1.62)        | 0.194        |
| 9p24.2         | rs7020673         | <i>GLIS3</i>              | C            | 0.48        | 0.95 (0.76, 1.17)        | 0.613        |
| 10p15.1        | rs11258747        | <i>PRKCQ</i>              | T            | 0.26        | 1.04 (0.82, 1.32)        | 0.749        |
| 10p15.1        | rs12251307        | <i>IL2RA</i>              | T            | 0.11        | 0.99 (0.71, 1.39)        | 0.957        |
| 10q23.31       | rs10509540        | <i>RNLS</i>               | C            | 0.25        | 1.04 (0.80, 1.34)        | 0.780        |
| <b>11p15.5</b> | <b>rs1004446</b>  | <b>INS</b>                | <b>A</b>     | <b>0.32</b> | <b>0.75 (0.59, 0.96)</b> | <b>0.021</b> |
| 11p15.5        | rs7111341         | <i>INS</i>                | T            | 0.23        | 0.88 (0.67, 1.17)        | 0.376        |
| 12p13.31       | rs4763879         | <i>CD69</i>               | A            | 0.40        | 1.04 (0.84, 1.29)        | 0.716        |
| 12q13.2        | rs2292239         | <i>ERBB3</i>              | T            | 0.39        | 1.05 (0.83, 1.33)        | 0.676        |
| 12q24.12       | rs3184504         | <i>SH2B3</i>              | T            | 0.52        | 0.97 (0.79, 1.20)        | 0.790        |
| 14q24.1        | rs1465788         | <i>ZFP36L1, C14orf181</i> | T            | 0.29        | 1.06 (0.84, 1.35)        | 0.627        |
| 14q32.2        | rs4900384         | <i>C14orf64</i>           | G            | 0.31        | 0.86 (0.67, 1.10)        | 0.219        |
| 15q25.1        | rs3825932         | <i>CTSH</i>               | T            | 0.32        | 0.81 (0.63, 1.04)        | 0.102        |
| 16p11.2        | rs4788084         | <i>IL27</i>               | T            | 0.44        | 1.07 (0.86, 1.34)        | 0.538        |
| 16p13.13       | rs12708716        | <i>CLEC16A</i>            | G            | 0.29        | 1.13 (0.90, 1.43)        | 0.287        |
| 16q23.1        | rs7202877         | <i>CTRB2</i>              | G            | 0.12        | 1.04 (0.74, 1.46)        | 0.832        |
| 17p13.1        | rs16956936        | <i>2 genes</i>            | T            | 0.13        | 1.02 (0.72, 1.44)        | 0.913        |
| 17q12          | rs2290400         | <i>ORMDL</i>              | T            | 0.48        | 0.97 (0.79, 1.20)        | 0.771        |
| 17q21.2        | rs7221109         | <i>CCR7</i>               | T            | 0.38        | 1.06 (0.85, 1.32)        | 0.620        |
| 18p11.21       | rs1893217         | <i>PTPN2</i>              | G            | 0.18        | 1.11 (0.82, 1.49)        | 0.517        |

SUPPLEMENTARY DATA

|          |            |                |   |      |                   |       |
|----------|------------|----------------|---|------|-------------------|-------|
| 18q22.2  | rs763361   | <i>CD226</i>   | T | 0.49 | 1.19 (0.95, 1.50) | 0.135 |
| 19q13.32 | rs425105   | <i>PRKD2</i>   | C | 0.15 | 0.92 (0.67, 1.26) | 0.601 |
| 20p13    | rs2281808  | <i>SIRPG</i>   | T | 0.31 | 1.15 (0.91, 1.46) | 0.232 |
| 21q22.3  | rs11203203 | <i>UBASH3A</i> | A | 0.38 | 1.04 (0.83, 1.30) | 0.732 |
| 22q12.2  | rs5753037  | <i>HORMAD2</i> | T | 0.37 | 1.17 (0.92, 1.49) | 0.202 |
| 22q13.1  | rs229541   | <i>C1QTNF6</i> | A | 0.43 | 1.05 (0.84, 1.31) | 0.664 |

**The Teddy Study Group**

**Colorado Clinical Center:** Marian Rewers, M.D., Ph.D., PI<sup>1,4,5,6,10,11</sup>, Kimberly Bautista<sup>12</sup>, Judith Baxter<sup>9,10,12,15</sup>, Ruth Bedoy<sup>2</sup>, Daniel Felipe-Morales, Kimberly Driscoll, Ph.D.<sup>9</sup>, Brigitte I. Frohnert, M.D.<sup>2,14</sup>, Patricia Gesualdo<sup>2,6,12,14,15</sup>, Michelle Hoffman<sup>12,13,14</sup>, Rachel Karban<sup>12</sup>, Edwin Liu, M.D.<sup>13</sup>, Jill Norris, Ph.D.<sup>2,3,12</sup>, Adela Samper-Imaz, Andrea Steck, M.D.<sup>3,14</sup>, Kathleen Waugh<sup>6,7,12,15</sup>, Hali Wright<sup>12</sup>. University of Colorado, Anschutz Medical Campus, Barbara Davis Center for Childhood Diabetes.

**Finland Clinical Center:** Jorma Toppari, M.D., Ph.D., PI<sup>¥^1,4,11,14</sup>, Olli G. Simell, M.D., Ph.D.<sup>¥^1,4,11,13</sup>, Annika Adamsson, Ph.D.<sup>^12</sup>, Suvi Ahonen<sup>\*±§</sup>, Heikki Hyöty, M.D., Ph.D.<sup>\*±6</sup>, Jorma Ilonen, M.D., Ph.D.<sup>¥^13</sup>, Sanna Jokipuu<sup>^</sup>, Tiina Kallio<sup>^</sup>, Leena Karlsson<sup>^</sup>, Miia Kähönen<sup>μ±</sup>, Mikael Knip, M.D., Ph.D.<sup>\*±5</sup>, Lea Kovanen<sup>\*±§</sup>, Mirva Koreasalo<sup>\*±§2</sup>, Kalle Kurppa, M.D., Ph.D.<sup>\*±13</sup>, Tiina Latva-aho<sup>μ±</sup>, Maria Lönnrot, M.D., Ph.D.<sup>\*±6</sup>, Elina Mäntymäki<sup>^</sup>, Katja Multasuo<sup>μ±</sup>, Juha Mykkänen, Ph.D.<sup>¥^3</sup>, Tiina Niininen<sup>\*±12</sup>, Sari Niinistö<sup>±§</sup>, Mia Nyblom<sup>\*±</sup>, Petra Rajala<sup>^</sup>, Jenna Rautanen<sup>±§</sup>, Anne Riikonen<sup>\*±§</sup>, Mika Riikonen<sup>^</sup>, Jenni Rouhiainen<sup>^</sup>, Minna Romo<sup>^</sup>, Tuula Simell, Ph.D., Ville Simell<sup>^¥13</sup>, Maija Sjöberg<sup>¥^12,14</sup>, Aino Stenius<sup>μ±12</sup>, Maria Leppänen<sup>^</sup>, Sini Vainionpää<sup>^</sup>, Eeva Varjonen<sup>¥^12</sup>, Riitta Veijola, M.D., Ph.D.<sup>μ±14</sup>, Suvi M. Virtanen, M.D., Ph.D.<sup>\*±§2</sup>, Mari Vähä-Mäkilä<sup>^</sup>, Mari Åkerlund<sup>\*±§</sup>, Katri Lindfors, Ph.D.<sup>\*13</sup>. ¥University of Turku, \*University of Tampere, μUniversity of Oulu, ^Turku University Hospital, Hospital District of Southwest Finland, ±Tampere University Hospital, ²Oulu University Hospital, §National Institute for Health and Welfare, Finland, ¶University of Kuopio.

**Georgia/Florida Clinical Center:** Jin-Xiong She, Ph.D., PI<sup>1,3,4,11</sup>, Desmond Schatz, M.D.<sup>\*4,5,7,8</sup>, Diane Hopkins<sup>12</sup>, Leigh Steed<sup>12,13,14,15</sup>, Jamie Thomas<sup>\*6,12</sup>, Janey Adams<sup>\*12</sup>, Katherine Silvis<sup>2</sup>, Michael Haller, M.D.<sup>\*14</sup>, Melissa Gardiner, Richard McIndoe, Ph.D., Ashok Sharma, Joshua Williams, Gabriela Young, Stephen W. Anderson, M.D.<sup>^</sup>, Laura Jacobsen, M.D.<sup>\*14</sup>. Center for Biotechnology and Genomic Medicine, Augusta University. \*University of Florida, ^Pediatric Endocrine Associates, Atlanta.

**Germany Clinical Center:** Anette G. Ziegler, M.D., PI<sup>1,3,4,11</sup>, Andreas Beyerlein, Ph.D.<sup>2</sup>, Ezio Bonifacio Ph.D.<sup>\*5</sup>, Michael Hummel, M.D.<sup>13</sup>, Sandra Hummel, Ph.D.<sup>2</sup>, Kristina Foterek<sup>¥2</sup>, Nicole Janz, Mathilde Kersting, Ph.D.<sup>¥2</sup>, Annette Knopff<sup>7</sup>, Sibylle Koletzko, M.D.<sup>¶13</sup>, Claudia Peplow<sup>12</sup>, Roswith Roth, Ph.D.<sup>9</sup>, Marlon Scholz, Joanna Stock<sup>9,12,14</sup>, Katharina Warncke, M.D.<sup>14</sup>, Lorena Wendel, Christiane Winkler, Ph.D.<sup>2,12,15</sup>. Forschergruppe Diabetes e.V. and Institute of Diabetes Research, Helmholtz Zentrum München, and Klinikum rechts der Isar, Technische Universität München. \*Center for Regenerative Therapies, TU Dresden, ¶Dr. von Hauner Children's Hospital, Department of Gastroenterology, Ludwig Maximilians University Munich, ¥Research Institute for Child Nutrition, Dortmund.

**Sweden Clinical Center:** Åke Lernmark, Ph.D., PI<sup>1,3,4,5,6,8,10,11,15</sup>, Daniel Agardh, M.D., Ph.D.<sup>13</sup>, Carin Andrén Aronsson<sup>2,12,13</sup>, Maria Ask, Jenny Bremer, Ulla-Marie Carlsson, Corrado Cilio, Ph.D., M.D.<sup>5</sup>, Emelie Ericson-Hallström, Lina Fransson, Thomas Gard, Joanna Gerardsson, Rasmus Bennet, Monica Hansen, Gertie Hansson, Susanne Hyberg, Fredrik Johansen, Berglind Jonsdottir, M.D., Helena Elding Larsson, M.D., Ph.D.<sup>6,14</sup>, Marielle Lindström, Markus Lundgren, M.D.<sup>14</sup>, Maria Månsson-Martinez, Maria Markan, Jessica Melin<sup>12</sup>, Zeliha Mestan, Karin Ottosson, Kobra Rahmati, Anita Ramelius, Falastin Salami, Sara Sibthorpe, Birgitta Sjöberg, Ulrica Swartling, Ph.D.<sup>9,12</sup>, Evelyn Tekum Amboh, Carina Törn, Ph.D.<sup>3,15</sup>, Anne Wallin, Åsa Wimar<sup>12,14</sup>, Sofie Åberg. Lund University.

**Washington Clinical Center:** William A. Hagopian, M.D., Ph.D., PI<sup>1,3,4,5,6,7,11,13,14</sup>, Michael Killian<sup>6,7,12,13</sup>, Claire Cowen Crouch<sup>12,14,15</sup>, Jennifer Skidmore<sup>2</sup>, Josephine Carson, Maria Dalzell,

## SUPPLEMENTARY DATA

Kayleen Dunson, Rachel Hervey, Corbin Johnson, Rachel Lyons, Arlene Meyer, Denise Mulenga, Alexander Tarr, Morgan Uland, John Willis. Pacific Northwest Diabetes Research Institute.

**Pennsylvania Satellite Center:** Dorothy Becker, M.D., Margaret Franciscus, MaryEllen Dalmagro-Elias Smith<sup>2</sup>, Ashi Daftary, M.D., Mary Beth Klein, Chrystal Yates. Children's Hospital of Pittsburgh of UPMC.

**Data Coordinating Center:** Jeffrey P. Krischer, Ph.D., PI<sup>1,4,5,10,11</sup>, Michael Abbondandolo, Sarah Austin-Gonzalez, Maryouri Avendano, Sandra Baethke, Rasheedah Brown<sup>12,15</sup>, Brant Burkhardt, Ph.D.<sup>5,6</sup>, Martha Butterworth<sup>2</sup>, Joanna Clasen, David Cuthbertson, Christopher Eberhard, Steven Fiske<sup>9</sup>, Dena Garcia, Jennifer Garmeson, Veena Gowda, Kathleen Heyman, Francisco Perez Laras, Hye-Seung Lee, Ph.D.<sup>1,2,13,15</sup>, Shu Liu, Xiang Liu, Ph.D.<sup>2,3,9,14</sup>, Kristian Lynch, Ph.D.<sup>5,6,9,15</sup>, Jamie Malloy, Cristina McCarthy<sup>12,15</sup>, Steven Meulemans, Hemang Parikh, Ph.D.<sup>3</sup>, Chris Shaffer, Laura Smith, Ph.D.<sup>9,12</sup>, Susan Smith<sup>12,15</sup>, Noah Sulman, Ph.D., Roy Tamura, Ph.D.<sup>1,2,13</sup>, Ulla Uusitalo, Ph.D.<sup>2,15</sup>, Kendra Vehik, Ph.D.<sup>4,5,6,14,15</sup>, Ponni Vijayakandipan, Keith Wood, Jimin Yang, Ph.D., R.D.<sup>2,15</sup>. *Past staff:* Lori Ballard, David Hadley, Ph.D., Wendy McLeod. University of South Florida.

**Autoantibody Reference Laboratories:** Liping Yu, M.D.<sup>^5</sup>, Dongmei Miao, M.D.<sup>^</sup>, Polly Bingley, M.D., FRCP\*<sup>5</sup>, Alistair Williams\*, Kyla Chandler\*, Saba Rokni\*, Claire Williams\*, Rebecca Wyatt\*, Gifty George\*, Sian Grace\*. <sup>^</sup>Barbara Davis Center for Childhood Diabetes, University of Colorado Denver, \*School of Clinical Sciences, University of Bristol UK.

**HLA Reference Laboratory:** Henry Erlich, Ph.D.<sup>3</sup>, Steven J. Mack, Ph.D., Anna Lisa Fear. Center for Genetics, Children's Hospital Oakland Research Institute.

**Repository:** Sandra Ke, Niveen Mulholland, Ph.D. NIDDK Biosample Repository at Fisher BioServices.

**SNP Laboratory:** Stephen S. Rich, Ph.D.<sup>3</sup>, Wei-Min Chen, Ph.D.<sup>3</sup>, Suna Onengut-Gumuscu, Ph.D.<sup>3</sup>, Emily Farber, Rebecca Roche Pickin, Ph.D., Jordan Davis, Dan Gallo, Jessica Bonnie, Paul Campolieto. Center for Public Health Genomics, University of Virginia.

**Project scientist:** Beena Akolkar, Ph.D.<sup>1,3,4,5,6,7,10,11</sup>, National Institutes of Diabetes and Digestive and Kidney Diseases.

**Other contributors:** Kasia Bourcier, Ph.D.<sup>5</sup>, National Institutes of Allergy and Infectious Diseases. Thomas Briese, Ph.D.<sup>6,15</sup>, Columbia University. Suzanne Bennett Johnson, Ph.D.<sup>9,12</sup>, Florida State University. Eric Triplett, Ph.D.<sup>6</sup>, University of Florida.

### ***Committees:***

<sup>1</sup>Ancillary Studies, <sup>2</sup>Diet, <sup>3</sup>Genetics, <sup>4</sup>Human Subjects/Publicity/Publications, <sup>5</sup>Immune Markers, <sup>6</sup>Infectious Agents, <sup>7</sup>Laboratory Implementation, <sup>8</sup>Maternal Studies, <sup>9</sup>Psychosocial, <sup>10</sup>Quality Assurance, <sup>11</sup>Steering, <sup>12</sup>Study Coordinators, <sup>13</sup>Celiac Disease, <sup>14</sup>Clinical Implementation, <sup>15</sup>Quality Assurance Subcommittee on Data Quality.
